# Supplementary material for: IGFBPL1 in DRG Nociceptors Drives Neuropathic Pain and Neuroimmune Crosstalk via IGF1R–ERK Signaling
Source: Research Square preprint supplement (doi:10.21203/rs.3.rs-7783701/v1), 2025-11-19
Supplement: Supplementary file 1 [file e9ae164ac421c8f3ecb07ffe.pdf]

## Supplementary Information

### **IGFBPL1 in DRG Nociceptors Drives Neuropathic Pain and Neuroimmune Crosstalk via IGF1R–ERK Signaling**

Emmanuel Acquah<sup>1</sup>, An Nazmus Sakib<sup>1</sup>, Sang Seong Kim<sup>1</sup>, Hyuk Sang Kwon<sup>1</sup>,  
Young Ro Kim<sup>2,3</sup>, and Euiheon Chung<sup>1,4\*</sup>

\*Corresponding author: Euiheon Chung, ogong50@gist.ac.kr

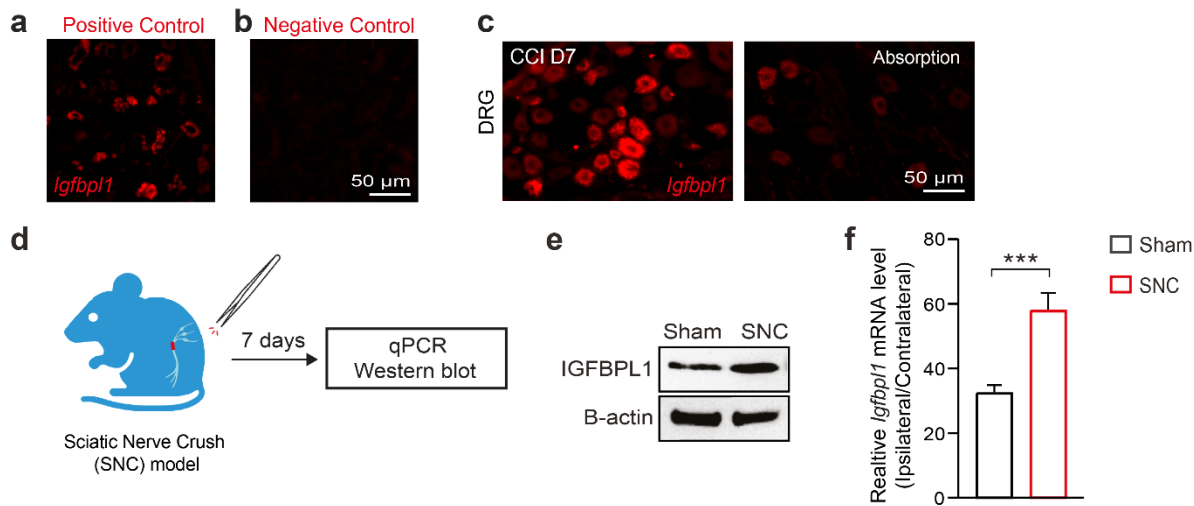

**Supplementary Fig. 1: The specificity of *Igfbp1* probe and antibody, and the upregulation of *Igfbp1* mRNA and IGFBPL1 protein in Sciatic nerve crush (SNC).**

(a,b) RNAscope ISH of DRG sections of adult mice with the positive (a) and negative control (b). c The staining of DRG with *Igfbp1* antibody without (left) or with (right) absorption with *Igfbp1* peptide in Sham (c) or CCI mice (d) 7-day post-CCI surgery.  $n = 3$  mice per group. Scale bar, 50  $\mu$ m. d–f) Schematic representation of Sciatic Nerve Crush (SNC) model, where the sciatic nerve of the animal was subjected to crush injury. Tissue samples were collected on day 7 post-injury and analyzed by Western blot (d) and qPCR (e). A significant increase in *Igfbp1* mRNA and IGFBPL1 protein expressions were observed in the SNC compared to the Sham.  $\beta$ -actin used as a loading control. Data are presented as mean  $\pm$  SEM. \*\*\* $P < 0.001$ . Student t test (F).  $n = 3$  mice per group.

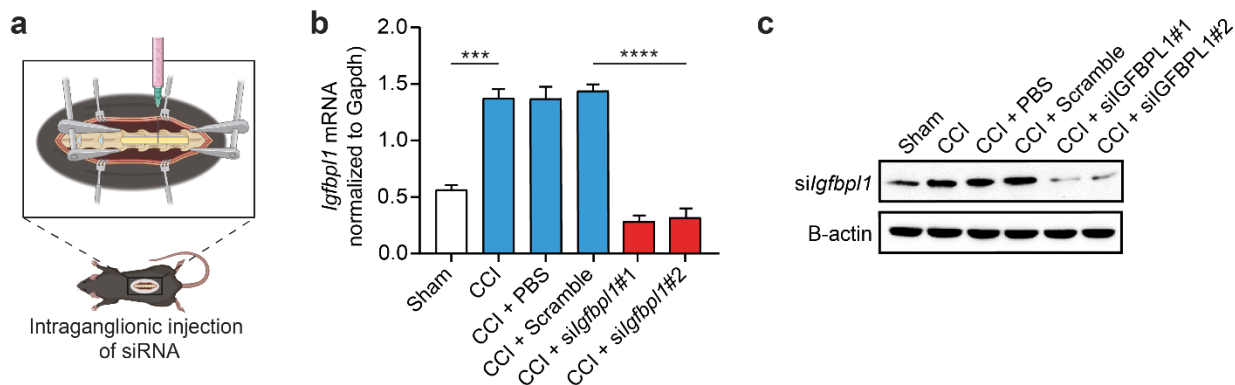

**Supplementary Fig. 2: *In vivo* knockdown of IGFBPL1 and validation.**

(a–c) Experimental scheme (a) and validation of si*Igfbp1* knockdown efficiency assessed by qRT-PCR (b) and western blot (c) after DRG-targeted injection. Student's t-test,  $n = 4$  mice per group; \*\*\* $P < 0.001$ , and \*\*\*\* $P < 0.0001$ . All data are presented as mean  $\pm$  SEM.

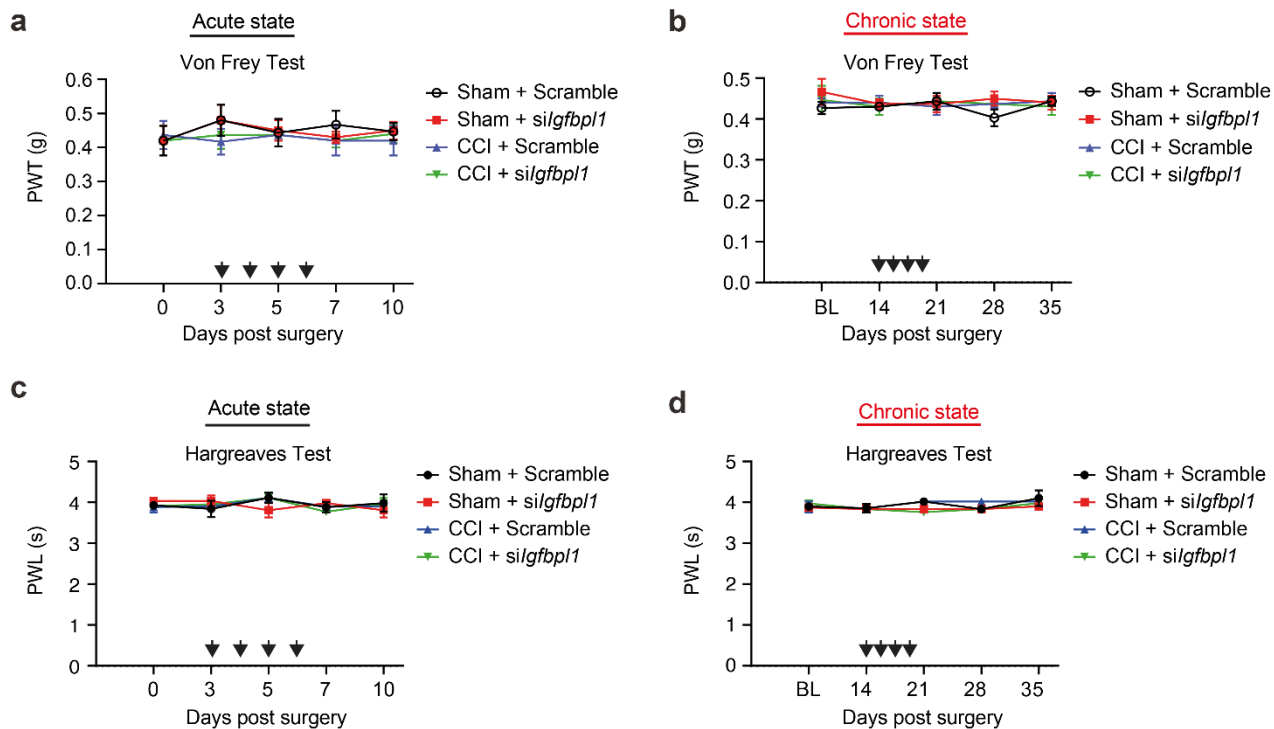

**Supplementary Fig. 3: Behavioral evaluation of mechanical and thermal pain sensitivity in acute and chronic states following peripheral nerve injury.**

(a–d) Behavioral tests evaluating paw withdrawal responses in acute and chronic states using the Von Frey and Hargreaves tests across experimental groups: Sham + Scramble, Sham + *silgfbp1*, CCI + Scramble, and CCI + *silGFBPL1*. Acute state (Von Frey Test): Intraganglionic injection of *silgfbp1* in the contralateral DRG on post-CCI days 3 to 6 (acute phase) or days 14 to 17 (chronic phase) failed to attenuate CCI-induced mechanical allodynia (a,c) and thermal hyperalgesia (b,d). Two-way ANOVA followed by post hoc Bonferroni's test,  $n = 12$  mice per group. All data are presented as mean  $\pm$  SEM.

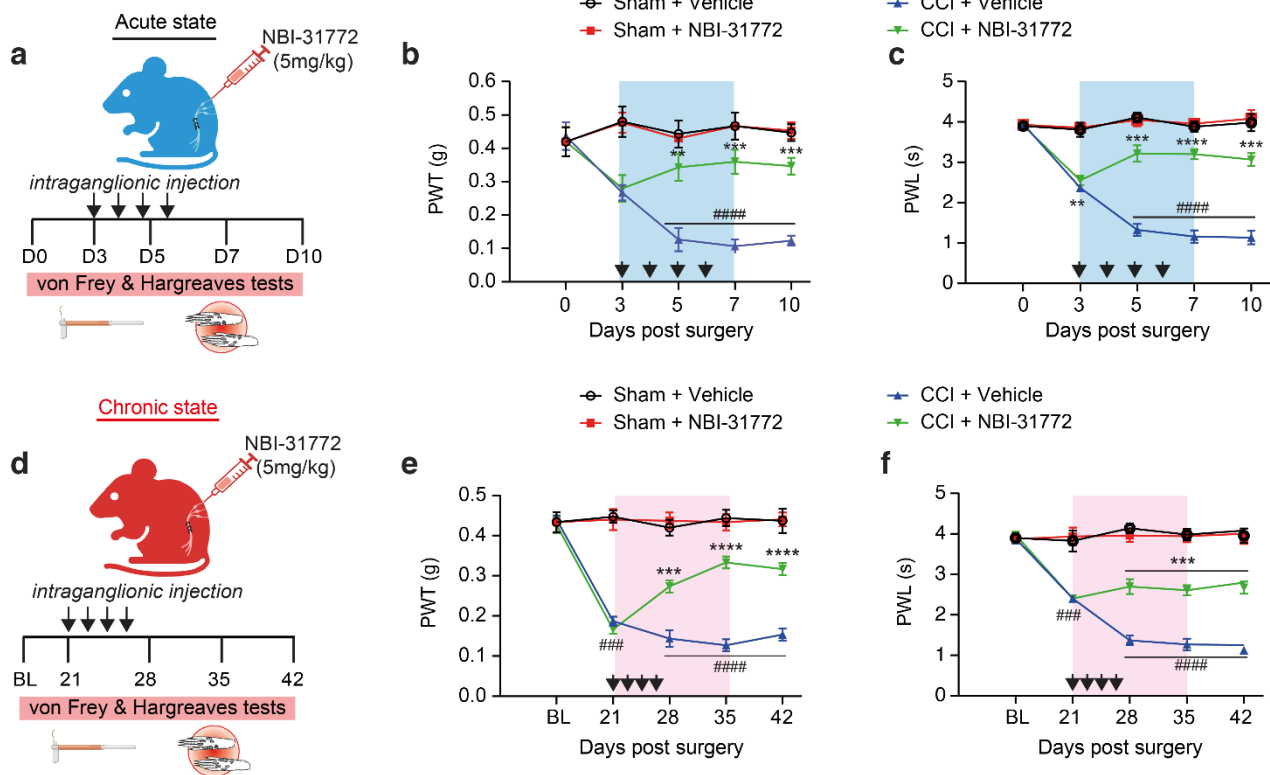

#### Supplementary Fig. 4: Pharmacological inhibition of IGFBP attenuated CCI-induced neuropathic pain.

(a–d) Experimental scheme displaying timeline behavioral assessment after intraganglionic injection of NBI-31772 or vehicle in the ipsilateral DRG in Sham or CCI mice. (b,c) Mechanical (b) and thermal (c) hyperalgesia in mice after NBI-31772 injection during the acute phase. (e,f) Mechanical (e) and thermal (f) hyperalgesia in mice after NBI-31772 injection during the chronic phase. Two-way ANOVA followed by post hoc Bonferroni's test,  $n = 12$  mice per group.  $*P < 0.05$ ,  $**P < 0.01$ , and  $***P < 0.001$ ;  $###P < 0.01$  and  $####P < 0.001$ . All data are presented as mean  $\pm$  SEM.

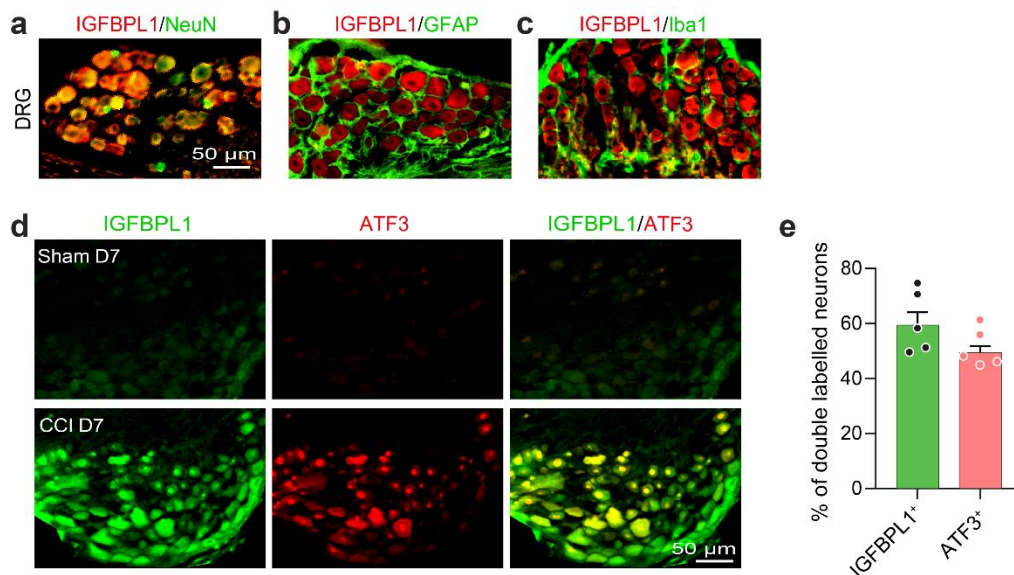

**Supplementary Fig. 5: The cell type distribution of IGFBPL1 and co-localization with ATF3 in the DRG.**

(a–d) Representative images of co-localization of IGFBPL1 with NeuN (a), GFAP (b) and Iba-1 (c) in mouse DRG. Scale bar, 50  $\mu$ m. f Double staining of IGFBPL1 and ATF3 in the DRG. Scale bar, 50  $\mu$ m. e Percentage of double-labeled neurons in IGFBPL1<sup>+</sup> and ATF3<sup>+</sup> double-labeled neurons.

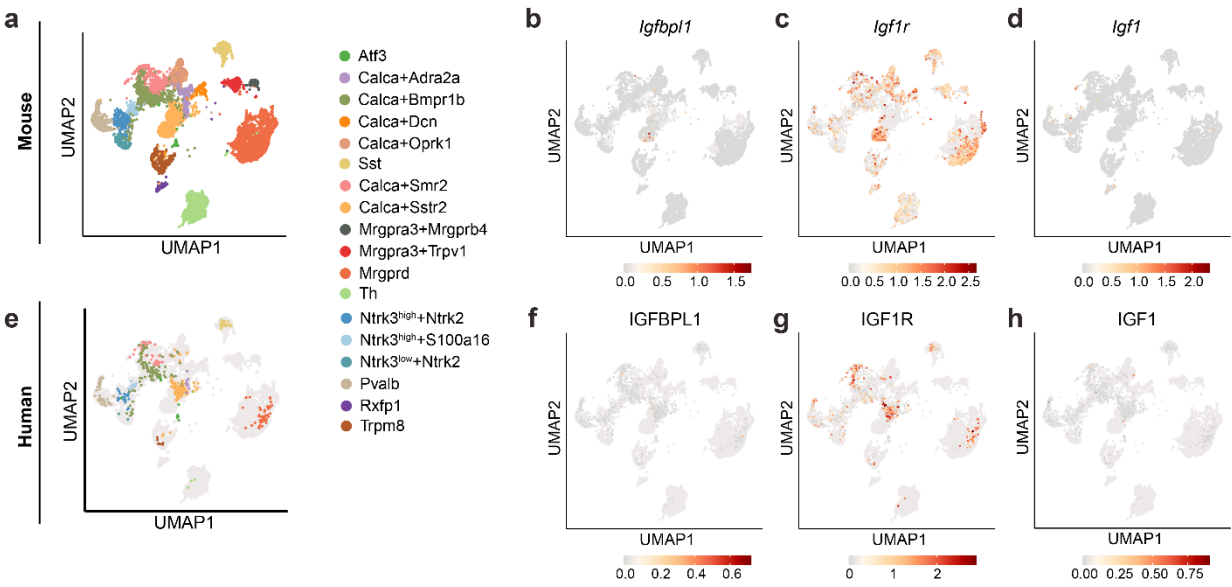

**Supplementary Fig. 6: *Igfbpl1* expression in the mouse and human DRGs.**

(a–h) UMAPs displaying clusters of DRG neuronal subtypes (a,e), injury-induced gene *Atf3* and the expression of IGF-related genes in mouse (*Igfbpl1*, *Igf1r* and *Igf1*) (b–d) and human (*IGFBPL1*, *IGF1R* and *IGF1*) (f–h) from scRNA-seq dataset<sup>43</sup>.

From Zhang et al 2022

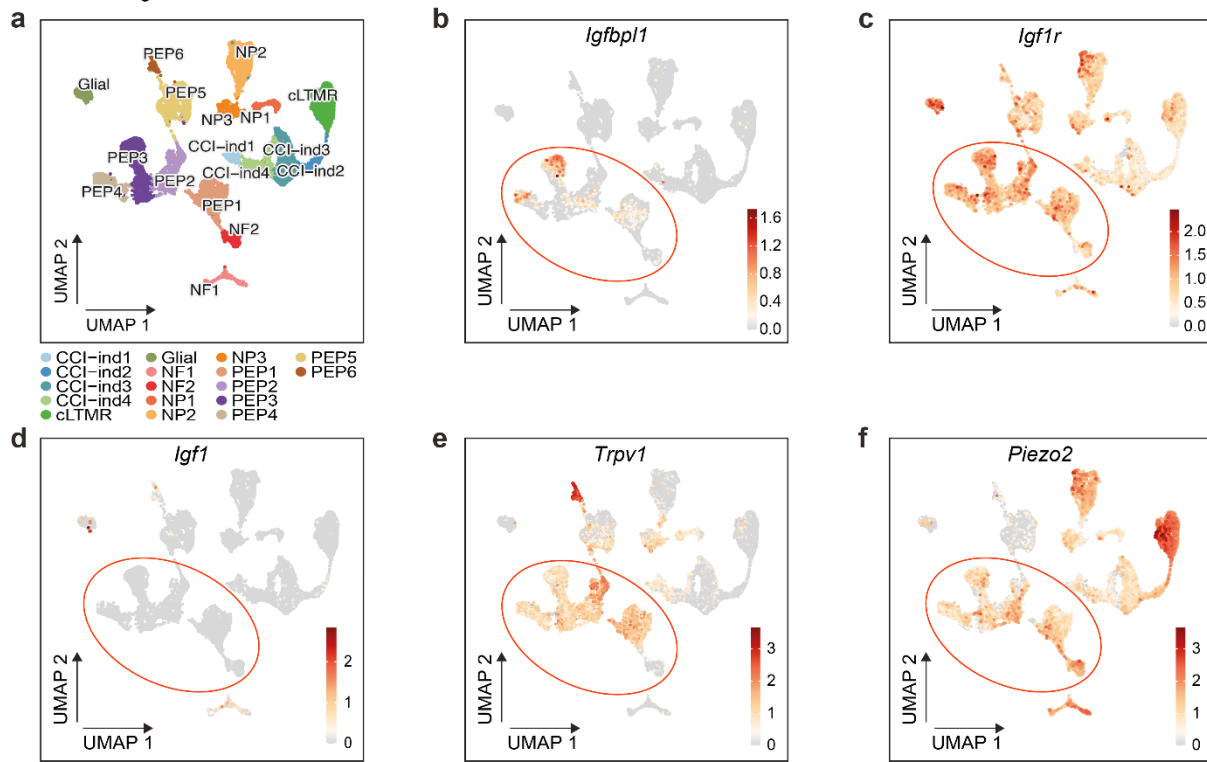

**Supplementary Fig. 7: *Igfbp1* expression in the mouse DRG neurons after CCI.**

(a–f) UMAP displaying 17 clusters of DRG cell populations (neurons and glia cells), and the expression patterns of *Igfbp1*, *Igf1r*, *Igf1*, *Trpv1* and *Piezo2*. High *Igfbp1* expression is localized predominantly within specific neuronal subpopulations (indicated by red circle). From scRNA-seq dataset<sup>44</sup>.



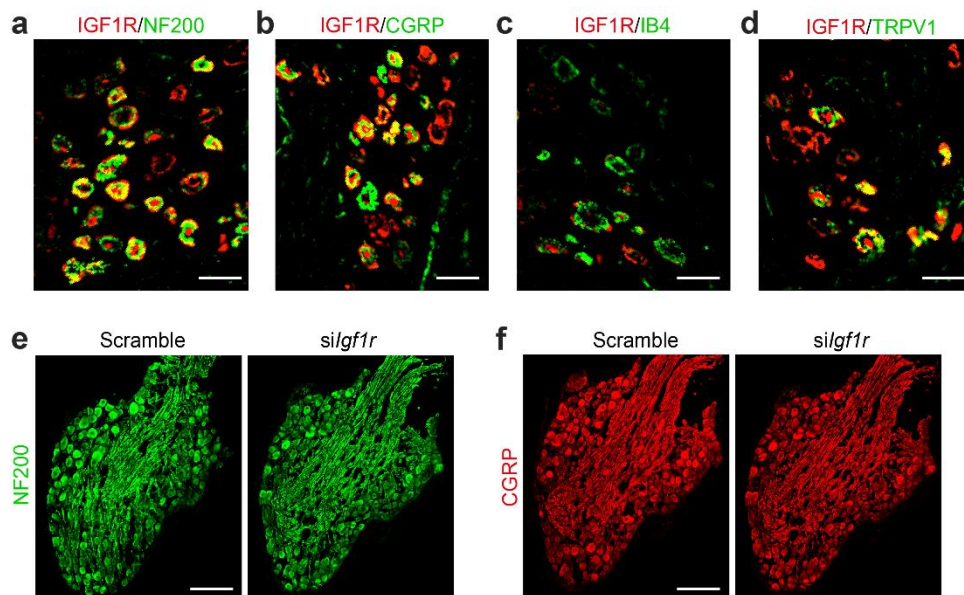

**Supplementary Fig. 8: Distribution of *Igf1r* mRNA in the DRG and the effects of IGF1R knockdown.**

(a–g) Representative image of RNAscope showing the co-localization of *Igf1r* with NF200 (a), CGRP (b), IB4 (c) and TRPV1 (d) in the DRG. (e) Percentage of double-labeled neurons in NF200<sup>+</sup>, CGRP<sup>+</sup>, IB4<sup>+</sup> and TRPV1<sup>+</sup> neurons. *Igf1r* knockdown mice show normal distribution patterns of NF200 (e), and CGRP (f) in the DRG. Percentage of NF200<sup>+</sup> and CGRP<sup>+</sup> neurons. *n* = 3 mice/group. Scale bar, 50 μm and 100 μm.

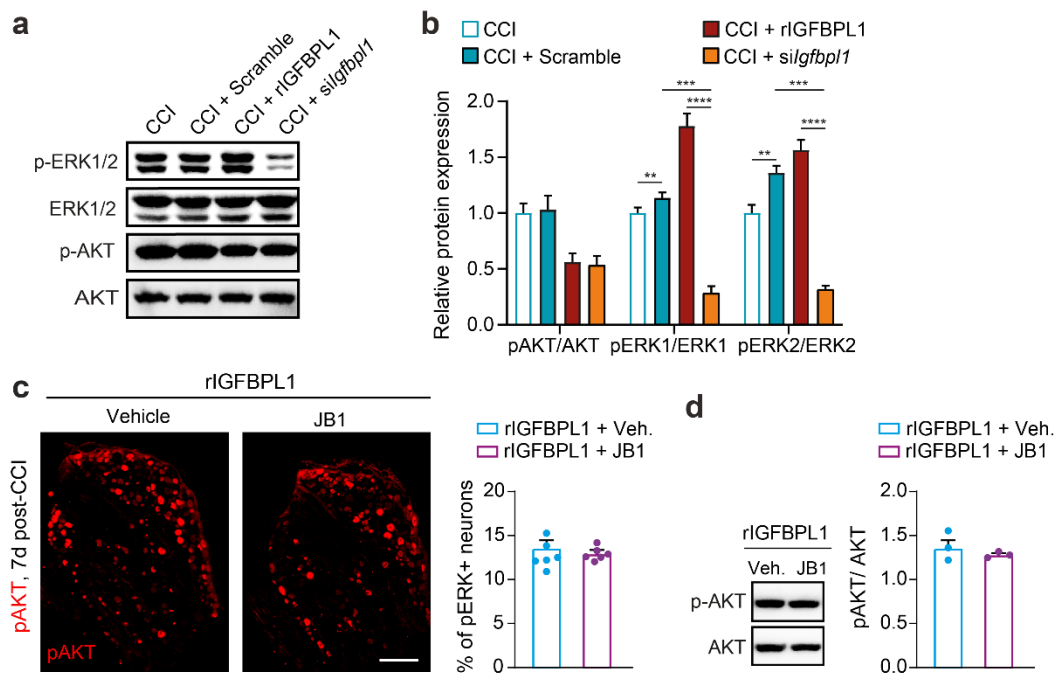

## Supplementary Fig. 9: The effect of pAKT pathway in IGFBPL1 and IGF1R-mediated pain behaviors.

(a, b) Western blot analysis and quantifications showing pERK (a) and pAKT (b) expression in DRG neurons from mice with *Igfbp1* knockdown or rIGFBPL1 overexpressed conditions. (c, d) Representative IHC staining and quantification of pAKT after intraganglionic JB-1 and rIGFBPL1 injection.  $n = 6$  mice. Scale bar, 100  $\mu\text{m}$ . (d) Immunoblotting analysis and quantification of pAKT protein expression in DRG neurons after JB-1 and rIGFBPL1 injection in CCI mice.  $n = 4$  mice per group. Two-way ANOVA followed by post hoc Bonferroni's test,  $n = 8$  mice per group.  $*P < 0.05$ , and  $**P < 0.01$ . All data are presented as mean  $\pm$  SEM.

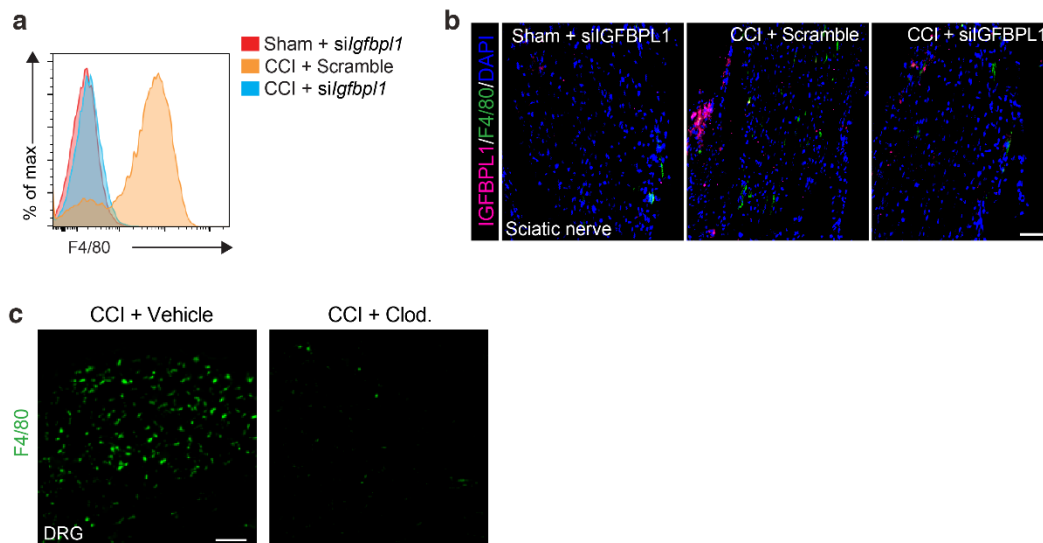

**Supplementary Fig. 10: The effects of IGFBPL1 inhibition and macrophage depletion on DRG macrophages.**

**a** Flow cytometry analysis of F4/80<sup>+</sup> cells isolated from DRGs following intraganglionic injection of *silgfbpl1* ( $n = 3$  independent experiments). **b** Representative immunostaining images showing IGFBPL1<sup>+</sup> cells (magenta), F4/80<sup>+</sup> macrophages (green), and nuclei (DAPI, blue), with reduced infiltrating macrophages after *Igfbpl1* knockdown ( $n = 5$  mice per group; scale bar, 50  $\mu$ m). **c** Representative immunostaining images of F4/80<sup>+</sup> cells in DRGs collected from vehicle or clodronate-treated mice after rIGFBPL1 injection. Clodronate treatment reduced the number of macrophages (scale bar, 50  $\mu$ m).

| Antibody     | Species | Company      | Cat. No.       | RRID        |
|--------------|---------|--------------|----------------|-------------|
| anti-IGFBPL1 | Goat    | R&D          | Cat# AF4130    | AB_2279980  |
| anti-IGF-1   | Mouse   | R&D          | Cat# AF791     | AB_2248752  |
| anti-IGF1R   | Mouse   | R&D          | Cat# MAB391    | AB_2122409  |
| anti-pIGF1R  | Rabbit  | SCB          | Cat# sc-81499  | AB_2797366  |
| IgG          | Rabbit  | CST          | Cat# 2729P     | AB_1031062  |
| anti-pERK1/2 | Rabbit  | CST          | Cat# 4370      | AB_2315112  |
| anti-ERK1/2  | Rabbit  | CST          | Cat# 4695      | AB_390779   |
| anti-pAKT    | Rabbit  | CST          | Cat# 9271      | AB_329828   |
| anti-AKT     | Rabbit  | CST          | Cat# 9272      | AB_329827   |
| NF200        | Mouse   | Millipore    | Cat# MAB5266   | AB_11212783 |
| IB4-FITC     | Mouse   | Sigma        | Cat#L2895      | AB_477295   |
| CGRP         | Rabbit  | CST          | Cat#14959S     | AB_2650536  |
| TRPV1        | Mouse   | Abcam        | Cat#ab203103   | AB_443297   |
| TRPV1        | Rabbit  | Alomone labs | Cat#ACC-030    | AB_10008453 |
| GS           | Rabbit  | ABclonal     | Cat#A21822     | AB_2735178  |
| NeuN         | Rabbit  | Abcam        | Cat#ab177487   | AB_444290   |
| NeuN         | Mouse   | CST          | Cat#94403S     | AB_2830192  |
| GFAP         | Mouse   | CST          | Cat#3670S      | AB_2223032  |
| IBA-1        | Rabbit  | ProteinTech  | Cat#10904-1-AP | AB_2315043  |
| TUBB3        | Rabbit  | Abcam        | Cat#ab52623    | AB_880896   |
| ATF3         | Rabbit  | CST          | Cat#18665S     | AB_2723386  |
| CD11b        | Rat     | BioLegend    | 101212 (APC)   | AB_312784   |
| F4/80        | Rat     | BioLegend    | 123110 (PE)    | AB_893653   |
| CD68         | Rat     | BioLegend    | 137012 (APC)   | AB_893654   |

116 Table S2. The specific primers used for qRT-PCR in this study

| Gene             | Forward Sequence       | Reverse Sequence        |
|------------------|------------------------|-------------------------|
| <i>Igfbpl1_1</i> | ATGCCCCCTCGAGATATTCA   | CTCGCACCTGGACAGCTATA    |
| <i>Igfbpl1_2</i> | GTGAGGGCTGTGCCTACCC    | CATCACATGCGGTCATCGGG    |
| <i>Igf1r</i>     | GTACCGGCACAACACTACTGCT | AGCCTGCTTCTCAGCTTCAG    |
| <i>Tnf-α</i>     | TGATCGGTCCCCAAAGGGAT   | TGTCTTTGAGATCCATGCCGT   |
| <i>Il-6</i>      | CAACGATGATGCACTTGCAGA  | GTGACTCCAGCTTATCTCTTGGT |
| <i>Il-1β</i>     | TGCCACCTTTTGACAGTGATG  | AAGGTCCACGGGAAAGACAC    |
| <i>Ccr2</i>      | ATCCACGGCATACTATCAACA  | CAAGGCTCACCATCATCGTAG   |
| <i>Gapdh</i>     | ATCACTGCCACCCAGAAGACT  | ATGCCAGTGAGCTTCCCGTT    |

117  
118  
119  
120  
121 Table S3. The siRNA sequences used in this study

| Target gene  | Sequence sense (5' to 3') | Sequence antisense (5' to 3') |
|--------------|---------------------------|-------------------------------|
| IGFBPL1_847  | GCUCCCGAUGACCGCAUGUTT     | ACAUGCGGUCAUCGGGAGCTT         |
| IGFBPL1_482  | GCGAGUUCGCUCCUGUGGUTT     | ACCACAGGAGCGAACUCGCTT         |
| Neg. Control | UUCUCCGAACGUGUCACGUTT     | ACGUGACACGUCGGAGAATT          |
